# Supplementary material for: Four new complete mitochondrial genomes of Gobioninae fishes (Teleostei: Cyprinidae) and their phylogenetic implications
Source: PeerJ. 2024 Jan 19;12:e16632. doi: 10.7717/peerj.16632 (PMC10802160; doi:10.7717/peerj.16632)
Supplement: Supplemental Information 8 [file peerj-12-16632-s008.xlsx]

## Sheet: Sheet1
Genes	tRNAPhe	rrnaS	tRNAVal	rrnaL	tRNALeu(UUR）	NAD1	tRNAIle	tRNAGln	tRNAMet	NAD2	tRNATrp	tRNAAla	tRNAAsn	tRNACys	tRNATyr	COX1	tRNASer(UCN）	tRNAAsp	COX2	tRNALys	ATP8	ATP6	COX3	tRNAGly	NAD3	tRNAArg	NAD4L	NAD4	tRNAHis	tRNASer(AGY）	tRNALeu(CUN）	NAD5	NAD6	tRNAGlu	Cytb	tRNAThr	tRNAPro	D-loop	Overlap	gap
Abbottina binhi							3	-2	1			2	1	31	1	1		3	13		1	-7	-1					-7			1		-4		2		-1		6	12
Abbottina obtusirostris							3	-2	1			2	1	41	1	1		3	13		1	-7	-1	-1									-4		2		-1		6	11
Abbottina rivularis							3	-2	1			2	1	31	1	1		3	13		1	-7	-1					-7			1		-4		2		-1		6	12
Acanthogobio guentheri						1	4	-2	1			2	1	30	2	1		3	13		1	-7	-1					-7			1		-4		2		-1		6	13
Belligobio nummifer						1	4	-1	1			3	1	31	1	1		5	13		1	-7	-1					-7			1		-4		4		-1		6	13
Biwia springeri						1	4	-2	1		1	2	1	31	2	1		3	13		1	-7				1		-7			1		-4		4		-1		5	15
Biwia zezera					1	1	4	-2	1			2	1	31	1	1		3	13		1	-7	-1					-7			1		-4		4				5	14
Coreius guichenoti						1	4	-2	1			2	1	28	1	1		3	13		1	-7	-1					-7	-1		1		-4		4		-1		7	13
Coreius heterodon						1	4	-2	1			2	1	30	1	1		3	13		1	-7	-1					-7	-2		1		-4		4		-1		7	13
Gnathopogon imberbis						1	4	-2	1			2	1	32	2	1		3	14		1	-7						-7			1		-4		2		-1		5	13
Gnathopogon nicholsi						1	4	-2	1			3	1	32	1	1		3	11		1	-7	-1					-7			1		-4		2		-1		6	13
Gnathopogon polytaenia						1	4	-2	1			2	1	32	1	1		3	13		1	-7	-1					-7			1		-4		2		-1		6	13
Gnathopogon strigatus						1	4	-2	1			2	1	32	2	1		3	14		1	-7						-7			1		-4		2		-1		5	13
Gnathopogon taeniellus						1	4	-2	2			2	1	32	1	1		3	13		1	-7	-1					-7		1	2		-4		2		-1		6	14
Gobio acutipinnatus						1	4	-2	1			3	1	30	2	1		3	13		1	-7	-1					-7			1		-4		4		-1		6	13
Gobio cynocephalus						1	4	-2	1			3	1	30	2	1		3	13		1	-7	-1					-7			1		-4		2		-1		6	13
Gobio macrocephalus						1	4	-2	1			3	1	31	2	1		3	13		1	-7	-1					-7			1		-4		4		-1		6	13
Gobio rivuloides						1	4	-2	1			2	1	30	2	1		3	13		1	-7	-1					-7			1		-4		2		-1		6	13
Gobiobotia brevibarba							3	-2	1			1	1	30	1	1		3	13		1	-7	-1					-7			1		-4		4		3		5	13
Gobiobotia filifer							4	-2			-1	3	1	31	1		1	3	12			-7	-1		-1			-7		1	2		-4		3		-1		8	11
Gobiobotia macrocephala							3	-2	1			2	1	31	1	1		3	13		1	-7	-1					-7			1		-4		4		-1		6	12
Gobiobotia naktongensis							3	-2	1			2	1	31	1	1		3	13		1	-7	-1					-7		1	2		-4		4	-1	-1		7	13
Gobiobotia pappenheimi							3	-2	1			3	1	31	2	1		3	13		1	-7	-1					-7			1		-4		4		-1		6	12
Gobiocypris rarus						1	4	-2	1			2	1	32	1	1		3	13		1	-7	-1					-7			1		-4		2		-1		6	13
Hemibarbus barbus						1	4	-2	1			2	1	31	1	1		3	13		1	-7	-1					-7			1		-4		4		-1		6	13
Hemibarbus labeo						1	4	-2	1			2	1	32	1	1	1	4	13		1	-7	-1	-1				-7	1		1		-4		4				6	15
Hemibarbus longirostris							4	-2	1		-2	1	1	31	1	1	1	4	13		1	-7	-1	-1		-2		-7	-1		1		-4		4				9	13
Hemibarbus maculatus						1		-2	1			2	1	31	1	1	1	4	13		1	-7	-1					-7			1		-4		4				5	13
Hemibarbus medius						1	4	-2	1			2	1	33	1	1		3	13		1	-7						-7			1		-4		2		-1		5	13
Hemibarbus mylodon							4	-3	1			1	1	31	1	1	1	4	13		1	-7	-1	-1		-2		-7	-1		1		-4		4				8	13
Hemibarbus umbrifer						1	4	-2	1			2	1	33	1	1		3	13		1	-7						-7			1		-4	-1	1		-1		6	13
Ladislavia taczanowskii						1	4	-2	1			2	1	30	2	1		3	13		1	-7	-1					-7			1		-4		2		-1		6	13
Microphysogobio alticorpus						1	4	-2	1			3	1	40	2	1		5	13		1	-7	-1				-1	-6			1		-4		2		-1		7	13
Microphysogobio amurensis						1	4	-2	1		5	-4	1	31	2	1		3	13		1	-7	-1					-7			1		-4		4		-1		7	13
Microphysogobio brevirostris						1	4	-2	1			3	1	31	2	1		5	13		1	-7	-1					-7			1		-4		4		-2		6	13
Microphysogobio chenhsienensis						1	4	-2	1			2	1	31	1	1		3	13		1	-7	-1					-7			1		-4		5		-1		6	13
Huigobio chinssuensis						1	4	-2	1			2	1	31	2	1		3	13		1	-7	-1					-7			1		-4		4		-1		6	13
Microphysogobio elongata						1	4	-2	1			2	1	31	2	1		3	13		1	-7	-1					-7			1		-4		4		-1		6	13
Microphysogobio fukiensis						1	4	-2	1			2	1	31	2	1		3	13		1	-7	-1					-7	-1		1		-4		2		-1		7	13
Microphysogobio jeoni		-1				1	4	-2	1			2	1	31	2	1		3	13		1	-7	-1					-7			1		-4		4		-1		7	13
Microphysogobio kiatingensis						1	4	-2	1			2	1	31	2	1		3	13		1	-7	-1					-7			1		-4		2		-1		6	13
Microphysogobio koreensis						1	4	-2	1			2	1	31	1	1		3	13		1	-7	-1					-7			1		-4		4		-1		6	13
Microphysogobio liaohensis						2	3	-2	1			3	1	31	2	1		3	13		1	-7	-1					-7			1		-4		4		-1		6	13
Microphysogobio longidorsalis						1	3	-2	1			2	1	31	2	1		3	13		1	-7						-7			1		-4		4		-1		5	13
Microphysogobio rapidus						1	4	-2	1			2	1	31	1	1		3	13		1	-7	-1					-7			1		-4		4		-1		6	13
Microphysogobio tafangensis						1	4	-2	1		1	2	1	31	1	1		3	13		1	-7				1		-7			1		-4		4		-1		5	15
Microphysogobio yaluensis						1	4	-2	1			2	1	31	2	1		3	13		1	-7						-7			1		-4		4		-1		5	13
Paracanthobrama guichenoti						1	4	-2	1			3	1	32		1		4	12		1	-7	-1					-7			1		-4		4		-1		6	12
Paraleucogobio notacanthus						1	4	-2	1			3	1	32	1	1		3	14		1	-7	-1					-7			1		-4		2		-1		6	13
Platysmacheilus exiguus						1	4	-2	1			2	1	31	2	1		3	13		1	-7	-1					-7	-1		1		-4		2		-1		7	13
Platysmacheilus longibarbatus						1	4	-2	1			2	1	31	2	1	-9	3	13		1	-7	-1					-7			1		-4		4		-1		7	13
Platysmacheilus nudiventris						1	4	-2	1			2	1	31	2	1		3	13		1	-7	-1					-7			1		-4		4		-1		6	13
Pseudogobio esocinus						1	4	-1	1		-1	2	1	31	1	1		3	13		1	-7	-1					-7			1		-4		4		-1		7	13
Pseudogobio guilinensis						1	4	-2	1			3	1	31	1	1		3	13		1	-7	-1					-7			1		-4		4		-1		6	13
Pseudogobio vaillanti						1	4	-2	1			3	1	31	1	1		3	13		1	-7	-1					-7			1		-4		4		-1		6	13
Pseudopungtungia nigra						1	4	-2	1			2	1	32	1	1		2	13		1	-7	-1					-7			1		-4		4		-1		6	13
Pseudopungtungia tenuicorpus						1	4	-2	1			2	1	32	1	1		2	13		1	-7	-1					-7			1		-4		4		-1		6	13
Pseudorasbora elongata						1	4	-2	1			2	2	31	1	1	1	3	13		1	-7	-1					-7			1		-4		2				5	14
Pseudorasbora interrupta					1	1	4	-2	1			1	1	32	1	1		3	14		1	-7	-1					-7		1	2		-4		4		-1		6	15
Pseudorasbora parva						1	4	-2	2	-1		1	1	32	1	1		2	14		1	-7	-1					-7	-2				-4		5		-1		8	12
Pseudorasbora pumila						1	4	-2	1		-2	1	1	32	2	1		2	14		1	-7	-1					-7			1		-4		4		-1		7	13
Pungtungia herzi						1	4	-2	1		-1	2	1	32	1	1		2	13		1	-7	-1					-7			1		-4		4		-1	1	8	13
Rhinogobio cylindricus						1	4	-2	1			2	1	30	2	1		3	15		1	-7	-1					-7			1		-4		2		-1		6	13
Rhinogobio nasutus						1	4	-2	1			2	1	30	2	1		3	15		1	-7	-1					-7			1		-4		2		-1		6	13
Rhinogobio typus						1	4	-2	1			3	1	30	2	1		3	15		1	-7	-1					-7			1		-4		2		-1		6	13
Rhinogobio ventralis						1	4	-2	1			2	1	30	2	1		3	15		1	-7	-1					-7					-4		2		-1		6	12
Romanogobio tenuicorpus						1	4	-2	1			2	1	31	2	1		3	13		1	-7	-1					-7			1		-4		4		-1		6	13
Sarcocheilichthys biwaensis						1	4	-2	1			2	1	30	1	1		3	9		1	-7						-7			1		-4		4		-1		5	13
Sarcocheilichthys davidi					1	1	4	-2	1			2	1	30	1	1		3	8		1	-7	-1					-7			1		-4		4		-1		6	14
Sarcocheilichthys kiangsiensis			1		1	1	4	-2	1			2	1	30	1	1		3	8		1	-7	-1					-7			1		-4		4		-1		6	15
Sarcocheilichthys lacustris					1	1	4	-2	1			2	1	30	2	1		3	11		1	-7	-1					-7			1		-4		4		-1		6	14
Sarcocheilichthys nigripinnis						1	4	-2	1			2	1	31	1	1		3	8		1	-7	-1					-7			1		-4		4				5	13
Sarcocheilichthys parvus					1		4	-2	1			2	1	30	2	1		3	6			-7	-1					-7			1		-4		1				5	12
Sarcocheilichthys sinensis						1	4	-2	1			2	1	30	2	1		3	11		1	-7	-1					-7			1		-4		1		-1		6	13
Sarcocheilichthys variegatus						1	4	-2	1			2	1	31	1	1		3	8		1	-7	-1					-7			1		-4		4				5	13
Saurogobio dabryi						1	4	-2	1			2	1	31	2	1		3	13		1	-7	-1					-7			-1	1	-4		4		-1		7	13
Saurogobio dumerili						1	4	-2	1			2	1	33	2	1		3	12		1	-7	-1					-7			-1		-4		4		-1		7	12
Saurogobio gracilicaudatus						1	5	-2	1			2	1	31	2	1		3	13		1	-7	-1					-7			-1	1	-4		4		-1		7	13
Saurogobio gymnocheilus						1	4	-2	1			2	1	33	2	1		3	12		1	-7	-1					-7			-1	1	-4		4		-1		7	13
Saurogobio xiangjiangensis						1	4	-2	1			2	1	30	2	1		3	10		1	-7	-1					-7			-1	1	-4		4		-1		7	13
Squalidus argentatus						1	4	-2	1				1	32	-1	1		3	13		1	-7	-1					-7					-4		4				6	10
Squalidus chankaensis						1	4	-2	1			1	1	31	1	1		3	13		1	-7	-1					-7	-1		1		-4		4		-1		7	13
Squalidus gracilis						1	4	-2	1			1	1	33	1	1		3	13		1	-7						-7			1		-4		4		-1		5	13
Squalidus japonicus coreanus						1	4	-2	1			1	1	32	1	1		3	13		1	-7	-1					-7			1		-4		2		-1		6	13
Squalidus mantschuricus						1	4	-2	1			1	1	30	1	1		2	13			-7	-1	-1	-1			-7			1		-4		4		-2		8	12
Squalidus wolterstorffi						1	4	-2	1			1	1	32	1	1		2	13		1	-7						-7			1		-4		4		-1		5	13
Xenophysogobio boulengeri							3	-2	1			3	1	30	2	1		3	13		1	-7	-1					-7			1		-4		4		-1		6	12
Xenophysogobio nudicorpa							3	-2	1			3	1	31	1	1		3	13		1	-7	-1					-7			1		-4		4		-1		6	12
Coreoleuciscus splendidus						1	4	-2	1			2	1	32	1	1	1	4	13		1	-7	-1	-1		1		-7			1		-4		2				6	15
